# Supplementary material for: Understanding influences on the uptake of pulmonary rehabilitation in the East of England: an Inclusive Design/mixed-methods study protocol
Source: PubMed Central journal article supplement — BMJ Open. 2018 Apr 24;8(4):e020750. doi: 10.1136/bmjopen-2017-020750 (PMC5922519; doi:10.1136/bmjopen-2017-020750), 2018-04-24
Supplement: bmjopen-2017-020750supp002.pdf [file bmjopen-2017-020750supp002.pdf]

## Appendix 2: Questions for semi-structured interview with patients

- **COPD journey of people with COPD:**

- Have you ever heard someone mentioned care journey or pathway to you?
- Can you share your COPD care journey, from how you diagnose to the pulmonary rehab?
- Looking at the picture, do you agree with this primary care pulmonary rehabilitation pathway? Can you possibly help me identify your care journey? Is there any difference in the pathway you have experienced?

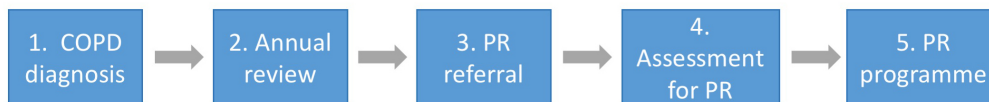

- From your perspective, which part of the care journey do you think is most challenging? And which part would be relatively easier for you?

*Probes:* Could you possibly tell me more about your needs along the journey?

- **Needs of people with COPD**

- Have you ever been referred to pulmonary rehabilitation?
- For people who have not been referred to PR:  
Have you ever heard about pulmonary rehab?
- For people declined an PR offer:  
I know you was referred to pulmonary rehab but declined, I wonder why you declined your PR offer?  
  
For people accept an PR offer:
- Can you recall your experience when you had just been referred to pulmonary rehabilitation? Is this your first time to do pulmonary rehabilitation or not? If not, are there any differences between the 1<sup>st</sup> and 2<sup>nd</sup> time?  
*Probes:* What was your feeling at that time? Can you tell me more about-----?
- Can you remember the first time you talked with your physiotherapist in the rehab centre? Can you remember what they told you?  
*Probes:* How you communicate with your physiotherapist/GP/practice nurse/doctor?
- How do you feel about pulmonary rehabilitation? Do you think it is helpful?  
*Probes:* Could you tell me more about-----?
- In your experience of accessing pulmonary rehabilitation, which things do you think do you think good? And what things do you think could be better?  
*Probes:* What about----- is it that made it so bad? Why do you think ----- is bad?
- Are there things that you think would have improved your pulmonary rehabilitation experience?  
*Probes:* Could you tell me more about-----?

- **The relationship between capabilities and accessibility**

- Here we are going to do a capability measure test. There will be about 6 sets of questions. The details questions can be seen in Appendix 3: Questions for measuring people's capability.
- How long have you been diagnosed with COPD? Have there been any significant changes in your life since your diagnosis?
- Do you think your capabilities (i.e., how well your vision, hearing, mobility, reach and stretch, dexterity, thinking and communication) will affect your access to pulmonary rehabilitation or not?

- Have there been any changes in your capabilities (vision, hearing, mobility, reach and stretch, dexterity, thinking and communication) since you were diagnosed? Do these changes affect your pulmonary rehabilitation especially the uptake and attendance process?

- **Personal information**

- Would you mind me asking you some personal information?
- What is your occupation?
- Please select your Age group
  - Under 16
  - 16-19
  - 30-44
  - 45-59
  - 60-74
  - Over 75
  - Do not wish to disclose
